# Supplementary material for: Changes in nitrogen availability lead to a reprogramming of pyruvate metabolism
Source: PubMed Central journal article supplement (PMC5935972; doi:10.1186/s12870-018-1301-x), 2018-05-04
Supplement: 12870_2018_1301_MOESM1_ESM.pdf [file 12870_2018_1301_MOESM1_ESM.pdf]

**Supplementary Materials:**

**Table S1: Primers sequence that were used for qPCR analysis**

| <b>Gene</b>     | <b>Forward primer</b>     | <b>Reverse primer</b>     |
|-----------------|---------------------------|---------------------------|
| <i>Hv-S40</i>   | GTCTGCCCCGGTCCTCGTG       | GTTCTCTTCGCGTCGTTGG       |
| <i>Hv-PP2A</i>  | CACCATTCTCAGCTTGATTG      | CACCCCTTTGTTATTGTTGTTG    |
| <i>Hv-GS2</i>   | AGCGCGATCTCACAGGTCG       | ATCGTCGTCTCTACGTACTIONGC  |
| <i>Hv-actin</i> | GGAAATGGCTGACGGTGAGGAC    | GGCGACCAACTATGCTAGGGAAAAC |
| <i>HvPK1</i>    | CTTTTCCTGCATCTCCCCTGA     | TGGTCACAGGCAAGCACATA      |
| <i>HvPK2</i>    | CGTGTAATTAGTGGTTTTCGTCGTC | GGCCAACAACAACAGCTAATGATA  |
| <i>HvPDH1</i>   | CATCGGGAACCTCATCAAGAAGA   | AGTGTCCAGCTCATCCCAGAAG    |
| <i>HvPDH2</i>   | CGACAAAACACAAAGGCGATAAAC  | GAGGAGGAGATGGATGGAGAGGAC  |
| <i>HvPDH4</i>   | CATCGTCCTCCTCGGCTAATCC    | GGTCCCTTGCTGTTGTTGTTG     |
| <i>HvPPdK1</i>  | CACITTCCTCCACCAGCCCTTAG   | ATTCCCTCTGCCCCATTCTTCC    |
| <i>HvPPdK2</i>  | CACGCAGATGACATTTGGTTACA   | CAAAGGGGTCATGCTGGAGGATA   |
| <i>HvPPdK3</i>  | TTGCACTACTAATGGCTCC       | GTCTTTCATGGCCTTGTTGC      |
| <i>HvPPdK4</i>  | AGAACGACACCGACCTGACTG     | CTCCTTTGGCTTCGACATAGAC    |
